# Supplementary material
Source: MDPI journal article supplement (https://www.mdpi.com/2072-4292/15/5/1360)
Supplement: s1 [file s1]

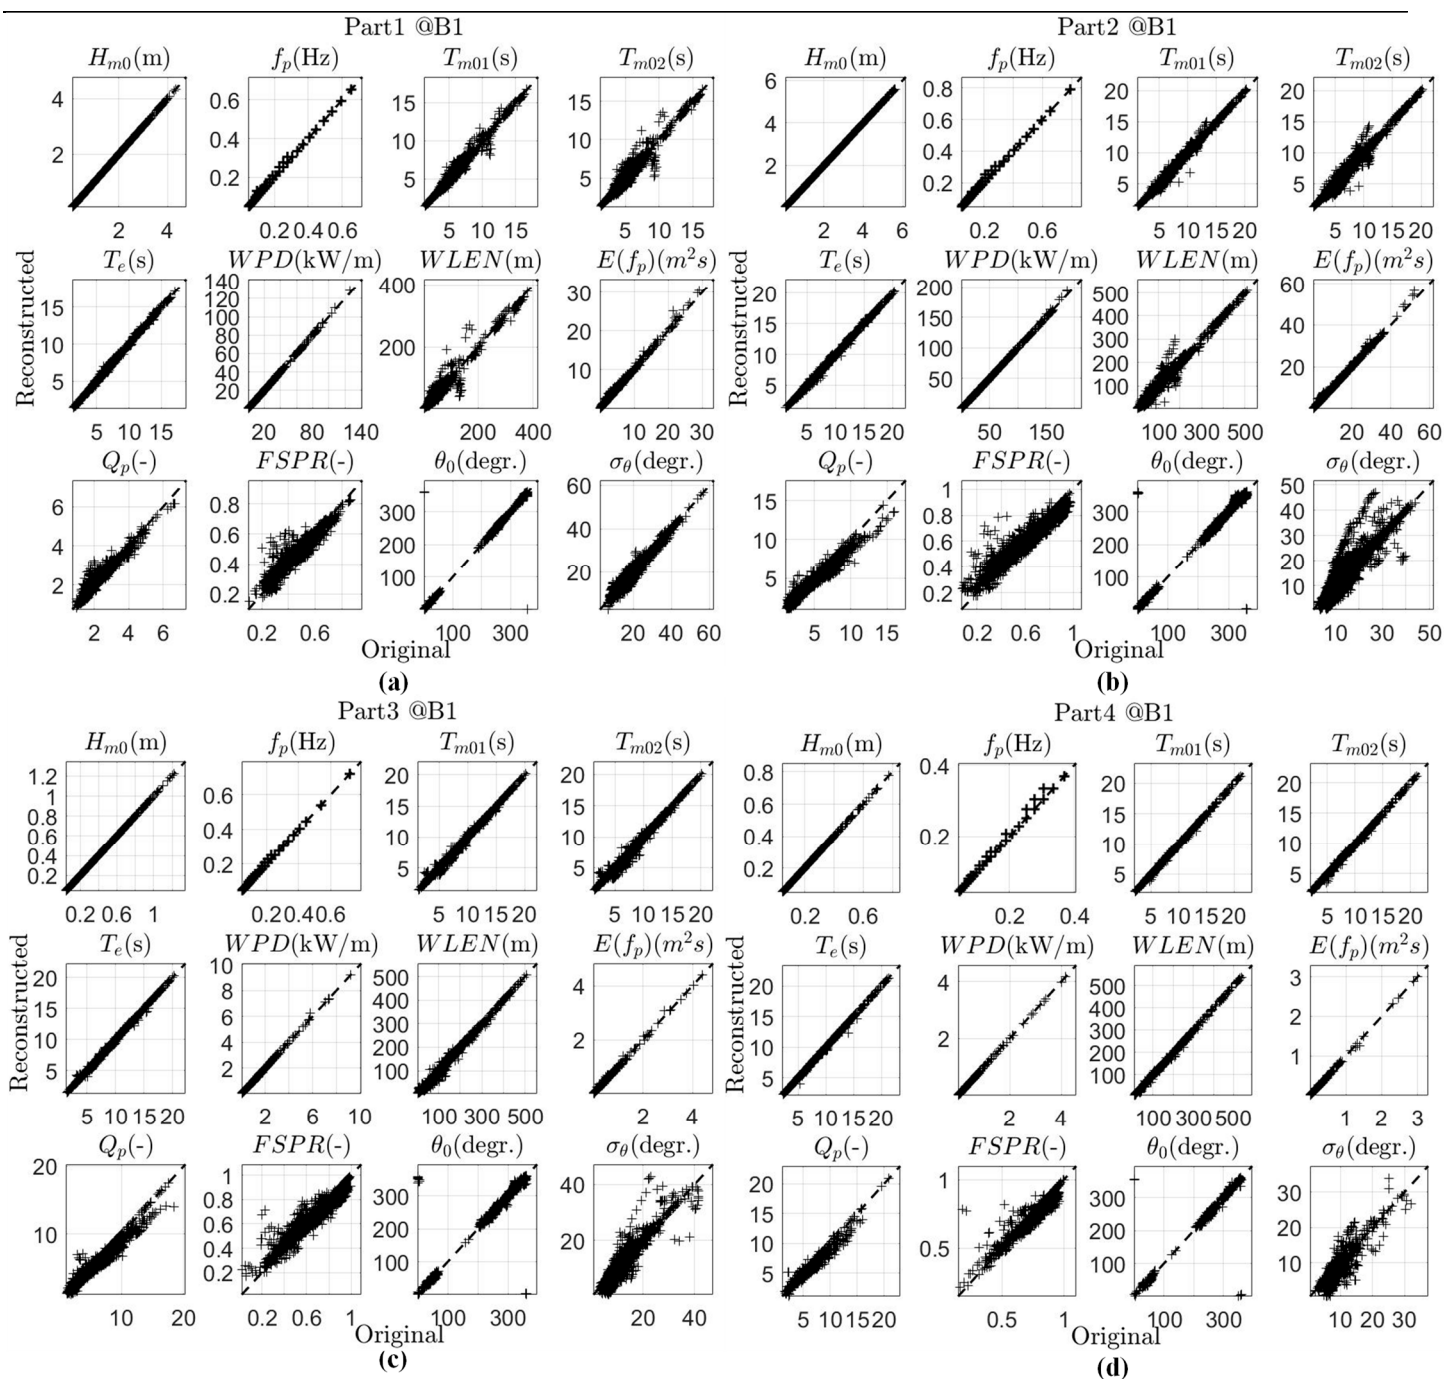

**Figure S1.** Scatter plots for KPs obtained from the original and the reconstructed partitions at check point B1: (a) Partition 1, (b) Partition 2, (c) Partition 3, and (d) Partition 4. The partitions from the same spectrum are ordered from large to small based on their  $H_{m0}$  values.

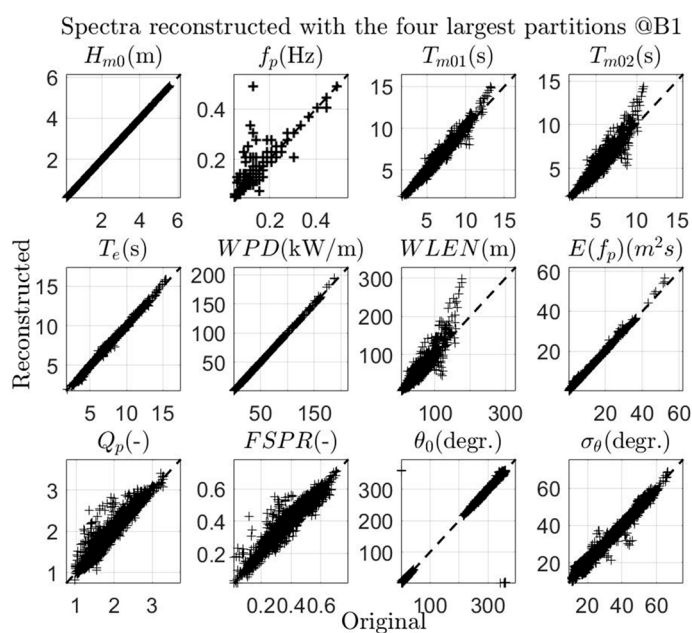

**Figure S2.** Scatter plots for KPs obtained from the original and the reconstructed spectra (with the four largest partitions) at check point B1.

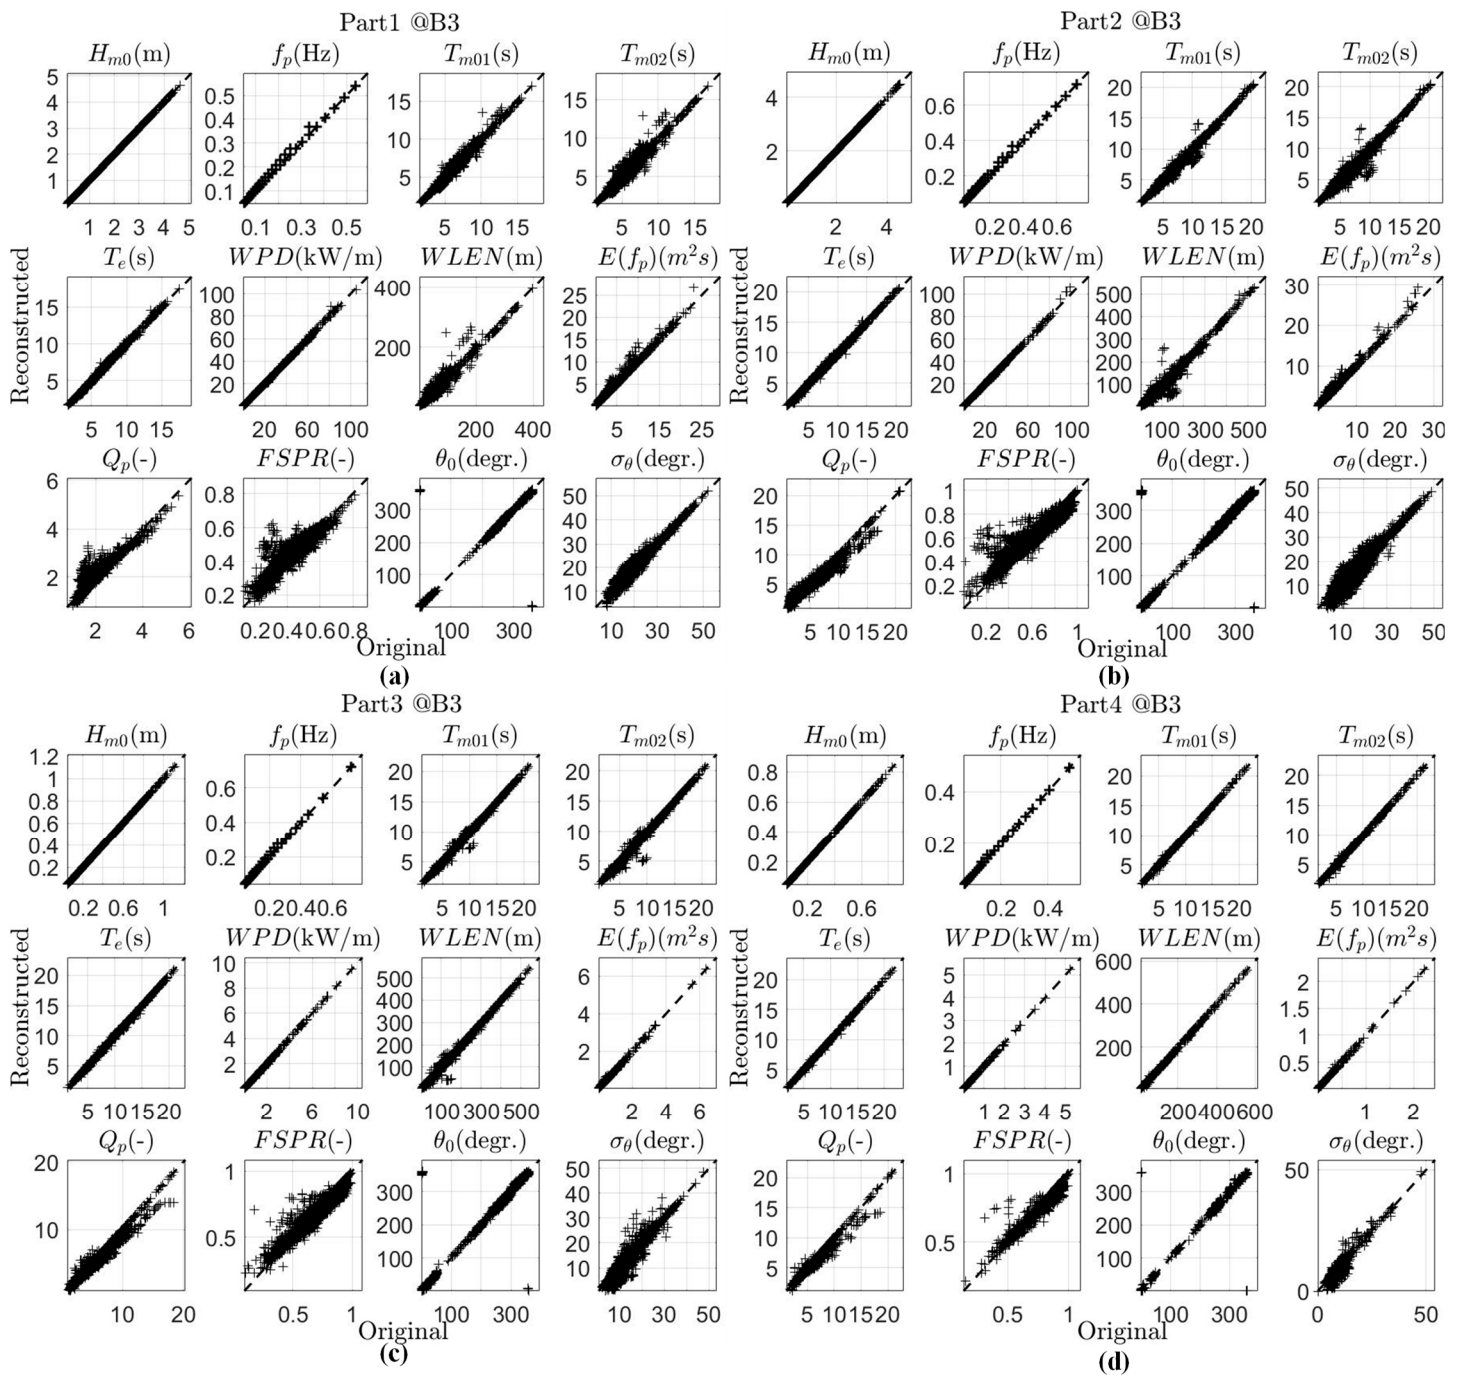

**Figure S3.** Scatter plots for KPs obtained from the original and the reconstructed partitions at check point B3: (a) Partition 1, (b) Partition 2, (c) Partition 3, and (d) Partition 4. The partitions from the same spectrum are ordered from large to small based on their  $H_{m0}$  values.

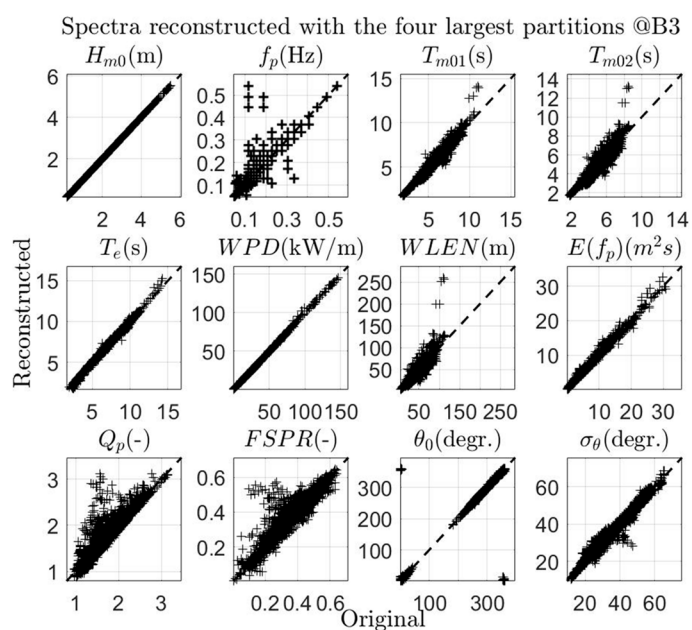

**Figure S4.** Scatter plots for KPs obtained from the original and the reconstructed spectra (with the four largest partitions) at check point B3.



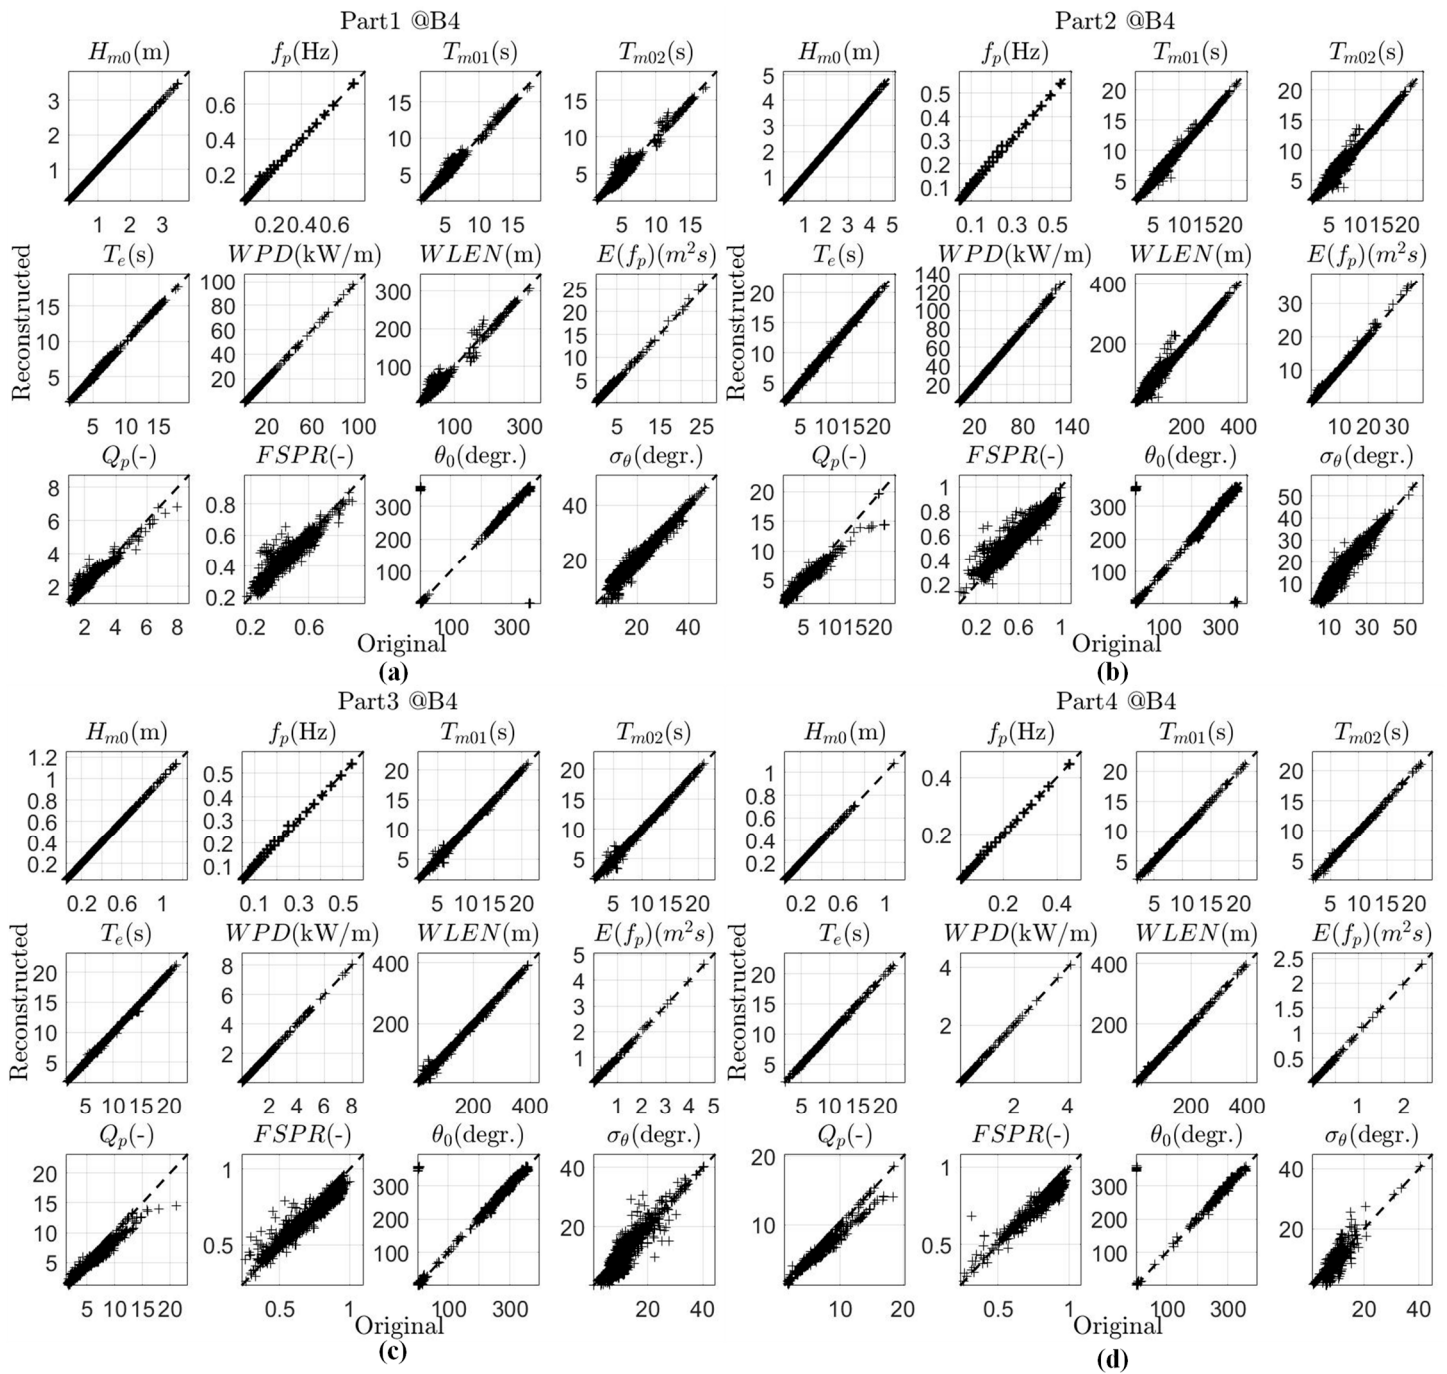

**Figure S5.** Scatter plots for KPs obtained from the original and the reconstructed partitions at check point B4: (a) Partition 1, (b) Partition 2, (c) Partition 3, and (d) Partition 4. The partitions from the same spectrum are ordered from large to small based on their  $H_{m0}$  values.

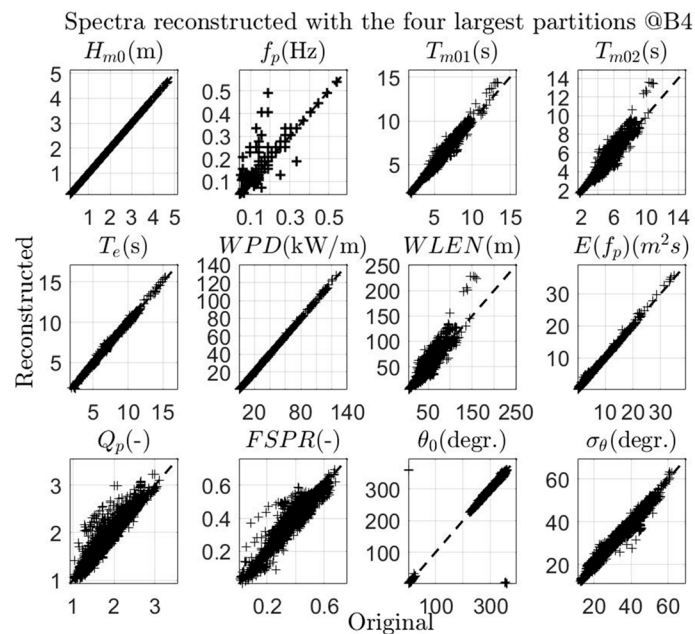

**Figure S6.** Scatter plots for KPs obtained from the original and the reconstructed spectra (with the four largest partitions) at check point B4.

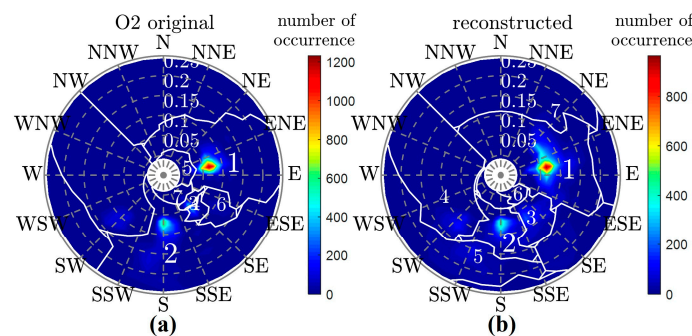

**Figure S7.** Groups identified at check point O2: **(a)** partition groups identified from the simulation with original boundaries, and **(b)** partition groups identified from the simulation with reconstructed boundaries. The  $f$ – $\theta$  spectral space is presented in polar coordinates, the number of occurrences of partition peaks in each  $f$ – $\theta$  cell is indicated by the colors, groups labeled 1–7 are ordered from large to small based on the peak-occurrence number, and the boundaries of the groups are depicted by the white lines.

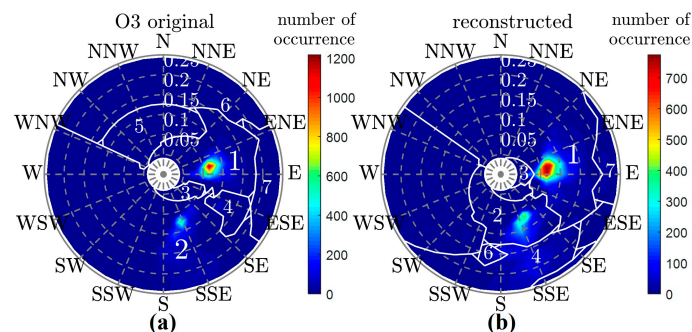

**Figure S8.** Groups identified at check point O3: **(a)** partition groups identified from the simulation with original boundaries, and **(b)** partition groups identified from the simulation with reconstructed boundaries. The  $f$ – $\theta$  spectral space is presented in polar coordinates, the number of occurrences of partition peaks in each  $f$ – $\theta$  cell is indicated by the colors, groups labeled 1–7 are ordered from large to small based on the peak-occurrence number, and the boundaries of the groups are depicted by the white lines.

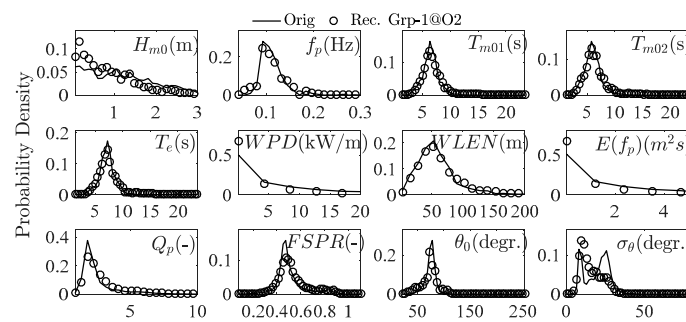

**Figure S9.** Probability distribution of partition KPs in Grp-1 at check point O2. Probability densities derived from spectra simulated with the original and the reconstructed boundaries are indicated by solid lines and circles, respectively. Each panel is titled according to the corresponding KP, and the x axis in each panel denotes the value range of the KP.

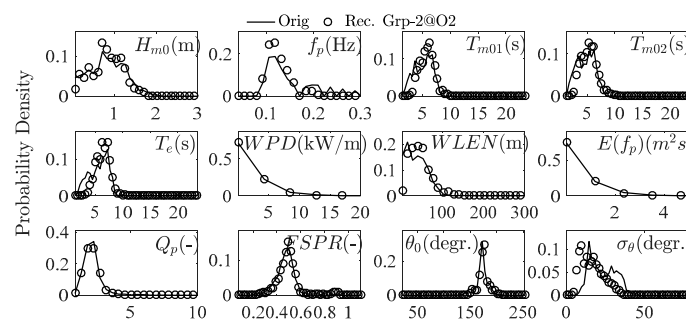

**Figure S10.** Probability distribution of partition KPs in Grp-2 at check point O2. Probability densities derived from spectra simulated with the original and the reconstructed boundaries are indicated by solid lines and circles, respectively. Each panel is titled according to the corresponding KP, and the x axis in each panel denotes the value range of the KP.

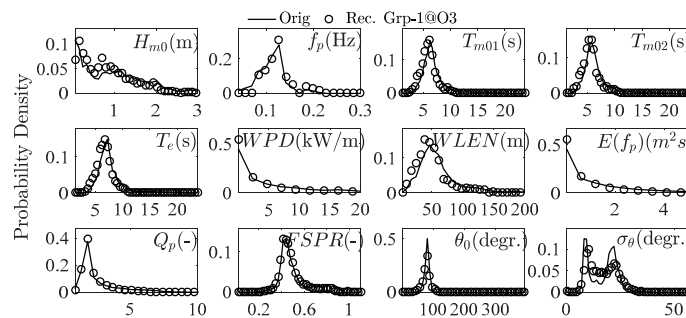

**Figure S11.** Probability distribution of partition KPs in Grp-1 at check point O3. Probability densities derived from spectra simulated with the original and the reconstructed boundaries are indicated by solid lines and circles, respectively. Each panel is titled according to the corresponding KP, and the x axis in each panel denotes the value range of the KP.

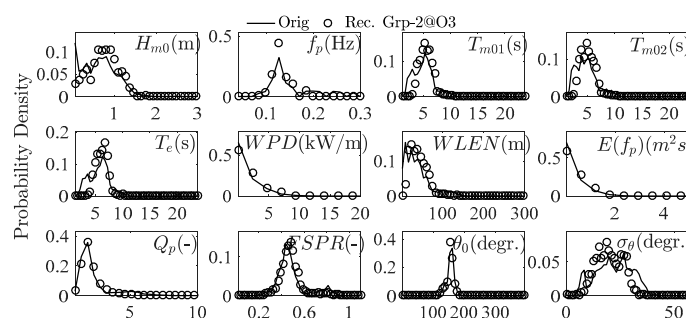

**Figure S12.** Probability distribution of partition KPs in Grp-2 at check point O3. Probability densities derived from spectra simulated with the original and the reconstructed boundaries are indicated by solid lines and circles, respectively. Each panel is titled according to the corresponding KP, and the x axis in each panel denotes the value range of the KP.

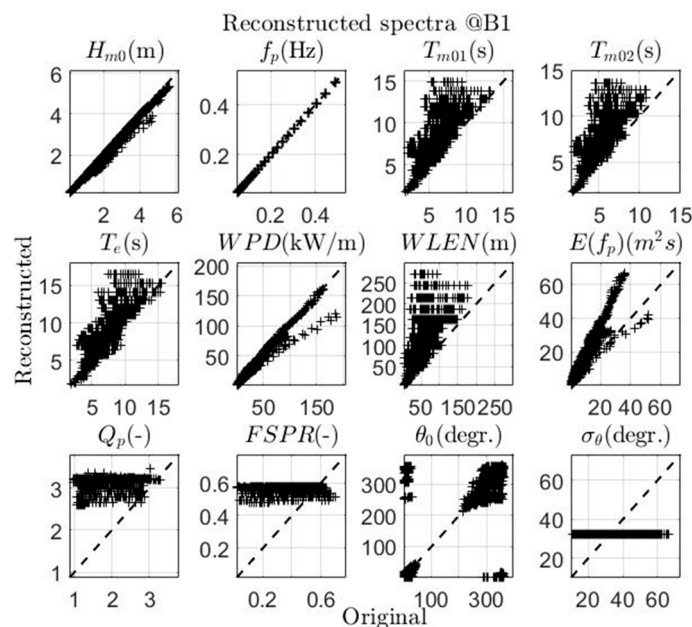

**Figure S13.** Scatter plots for KPs obtained from the original and the TMA–Mitsuyasu reconstructed spectra at check point B1.

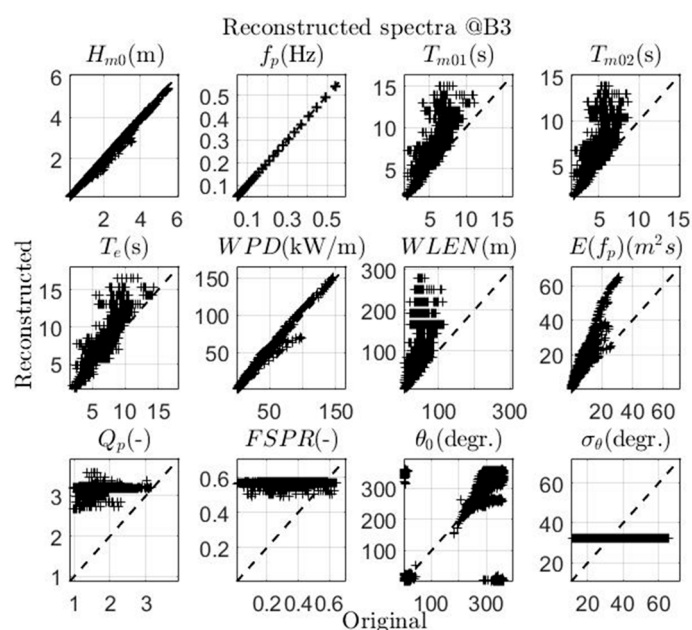

**Figure S14.** Scatter plots for KPs obtained from the original and the TMA–Mitsuyasu reconstructed spectra at check point B3.

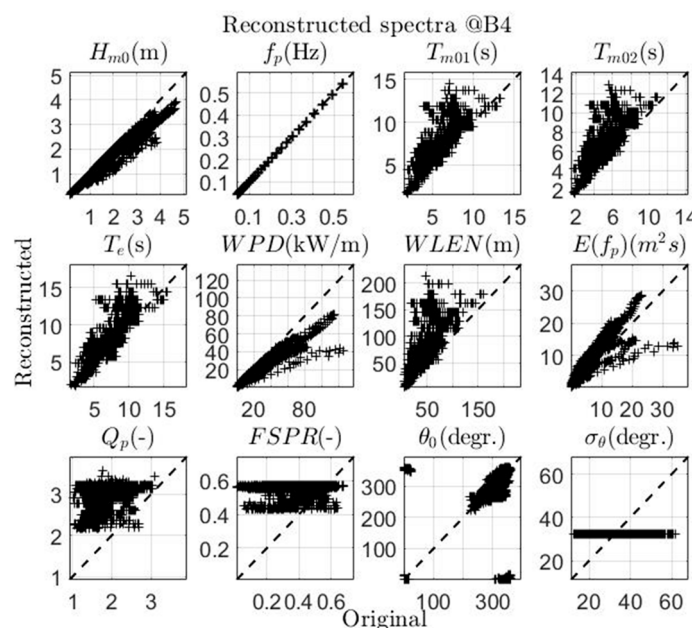

**Figure S15.** Scatter plots for KPs obtained from the original and the TMA–Mitsuyasu reconstructed spectra at check point B4.

**Table S1.** Correlation coefficient (R) of the KPs derived from the original and the reconstructed spectra/partitions at check point B1. Sample numbers of Part0 to Part6 are 8760, 6139, 8719, 3127, 1125, 384, and 109.

| KPs<br>Partn | $H_{m0}$ | $f_p$ | $T_{m01}$ | $T_{m02}$ | $T_e$ | $WPD$ | $WLEN$ | $E(f_p)$ | $Q_p$ | $FSPR$ | $\theta_{0,x}$ | $\theta_{0,y}$ | $\sigma_\theta$ |
|--------------|----------|-------|-----------|-----------|-------|-------|--------|----------|-------|--------|----------------|----------------|-----------------|
| Part0        | 1.000    | 0.968 | 0.989     | 0.962     | 0.999 | 1.000 | 0.945  | 0.999    | 0.969 | 0.969  | 0.999          | 0.999          | 0.994           |
| Part1        | 1.000    | 1.000 | 0.991     | 0.975     | 0.999 | 1.000 | 0.978  | 0.999    | 0.972 | 0.951  | 0.999          | 0.999          | 0.990           |
| Part2        | 1.000    | 1.000 | 0.997     | 0.992     | 0.999 | 1.000 | 0.992  | 0.999    | 0.987 | 0.975  | 0.997          | 0.995          | 0.964           |
| Part3        | 1.000    | 1.000 | 0.998     | 0.995     | 0.999 | 1.000 | 0.997  | 0.999    | 0.980 | 0.963  | 0.992          | 0.996          | 0.926           |
| Part4        | 1.000    | 1.000 | 0.999     | 0.999     | 0.999 | 1.000 | 0.999  | 1.000    | 0.979 | 0.939  | 0.992          | 0.997          | 0.879           |
| Part5        | 1.000    | 0.999 | 1.000     | 0.999     | 1.000 | 1.000 | 1.000  | 1.000    | 0.987 | 0.944  | 0.995          | 0.998          | 0.836           |
| Part6        | 1.000    | 1.000 | 0.999     | 0.998     | 1.000 | 1.000 | 0.999  | 0.999    | 0.986 | 0.961  | 0.995          | 0.998          | 0.874           |

**Table S2.** Mean absolute error (MAE) of the KPs derived from the original and the reconstructed spectra/partitions at check point B1. Sample numbers of Part0 to Part6 are 8760, 6139, 8719, 3127, 1125, 384, and 109.

| KPs<br>Partn | $H_{m0}$<br>(m) | $f_p$<br>(Hz) | $T_{m01}$<br>(s) | $T_{m02}$<br>(s) | $T_e$<br>(s) | $WPD$<br>(kW/m) | $WLEN$<br>(m) | $E(f_p)$<br>(m <sup>2</sup> s) | $Q_p$  | $FSPR$ | $\theta_0$<br>(degr.) | $\sigma_\theta$<br>(degr.) |
|--------------|-----------------|---------------|------------------|------------------|--------------|-----------------|---------------|--------------------------------|--------|--------|-----------------------|----------------------------|
| Part0        | 0               | 0.0012        | 0.1500           | 0.2400           | 0.0600       | 0.0900          | 4.1000        | 0.0862                         | 0.0508 | 0.0164 | 0.8000                | 0.6339                     |
| Part1        | 0               | 0.0002        | 0.1500           | 0.2400           | 0.0500       | 0.0600          | 4.1000        | 0.0531                         | 0.0715 | 0.0174 | 0.9000                | 0.5469                     |
| Part2        | 0               | 0.0001        | 0.1300           | 0.2100           | 0.0600       | 0.0600          | 4.2000        | 0.0552                         | 0.1953 | 0.0261 | 2.5000                | 1.3501                     |
| Part3        | 0               | 0.0001        | 0.1200           | 0.1600           | 0.0700       | 0.0000          | 3.7000        | 0.0044                         | 0.4022 | 0.0365 | 3.7000                | 1.5905                     |
| Part4        | 0               | 0.0001        | 0.0900           | 0.1100           | 0.0600       | 0.0000          | 2.8000        | 0.0023                         | 0.4311 | 0.0368 | 3.7000                | 1.6065                     |
| Part5        | 0               | 0.0002        | 0.0700           | 0.1000           | 0.0500       | 0.0000          | 2.5000        | 0.0008                         | 0.3872 | 0.0358 | 3.0000                | 1.5461                     |
| Part6        | 0               | 0.0000        | 0.0800           | 0.1100           | 0.0500       | 0.0000          | 2.8000        | 0.0006                         | 0.3937 | 0.0359 | 3.0000                | 1.3737                     |

**Table S3.** Correlation coefficient (R) of the KPs derived from the original and the reconstructed spectra/partitions at check point B3. Sample numbers of Part0 to Part6 are 8760, 6994, 8645, 3408, 849, 229, and 41.

| KPs<br>Partn | $H_{m0}$ | $f_p$ | $T_{m01}$ | $T_{m02}$ | $T_e$ | $WPD$ | $WLEN$ | $E(f_p)$ | $Q_p$ | $FSPR$ | $\theta_{0,x}$ | $\theta_{0,y}$ | $\sigma_\theta$ |
|--------------|----------|-------|-----------|-----------|-------|-------|--------|----------|-------|--------|----------------|----------------|-----------------|
|--------------|----------|-------|-----------|-----------|-------|-------|--------|----------|-------|--------|----------------|----------------|-----------------|

|       |       |       |       |       |       |       |       |       |       |       |       |       |       |
|-------|-------|-------|-------|-------|-------|-------|-------|-------|-------|-------|-------|-------|-------|
| Part0 | 1.000 | 0.956 | 0.985 | 0.958 | 0.998 | 1.000 | 0.935 | 0.997 | 0.936 | 0.947 | 0.999 | 0.999 | 0.990 |
| Part1 | 1.000 | 1.000 | 0.990 | 0.974 | 0.999 | 1.000 | 0.974 | 0.996 | 0.956 | 0.926 | 0.999 | 0.999 | 0.989 |
| Part2 | 1.000 | 1.000 | 0.996 | 0.991 | 0.999 | 1.000 | 0.991 | 0.998 | 0.987 | 0.965 | 0.996 | 0.997 | 0.981 |
| Part3 | 1.000 | 1.000 | 0.998 | 0.996 | 0.999 | 1.000 | 0.997 | 0.999 | 0.980 | 0.955 | 0.995 | 0.995 | 0.944 |
| Part4 | 1.000 | 1.000 | 0.999 | 0.999 | 1.000 | 1.000 | 0.999 | 0.999 | 0.981 | 0.954 | 0.994 | 0.995 | 0.942 |
| Part5 | 1.000 | 0.999 | 1.000 | 1.000 | 1.000 | 1.000 | 1.000 | 0.999 | 0.988 | 0.971 | 0.996 | 0.994 | 0.920 |
| Part6 | 1.000 | 1.000 | 1.000 | 1.000 | 1.000 | 1.000 | 1.000 | 0.997 | 0.977 | 0.975 | 0.996 | 0.981 | 0.899 |

**Table S4.** Mean absolute error (MAE) of the KPs derived from the original and the reconstructed spectra/partitions at check point B3. Sample numbers of Part0 to Part6 are 8760, 6994, 8645, 3408, 849, 229, and 41.

| KPs<br>Partn | $H_{m0}$<br>(m) | $f_p$<br>(Hz) | $T_{m01}$<br>(s) | $T_{m02}$<br>(s) | $T_e$<br>(s) | WPD<br>(kW/m) | WLEN<br>(m) | $E(f_p)$<br>(m <sup>2</sup> s) | $Q_p$  | FSPR   | $\theta_0$<br>(degr.) | $\sigma_\theta$<br>(degr.) |
|--------------|-----------------|---------------|------------------|------------------|--------------|---------------|-------------|--------------------------------|--------|--------|-----------------------|----------------------------|
| Part0        | 0               | 0.0017        | 0.1400           | 0.2200           | 0.0600       | 0.1000        | 3.5000      | 0.1001                         | 0.0575 | 0.0190 | 0.9000                | 0.7306                     |
| Part1        | 0               | 0.0002        | 0.1600           | 0.2500           | 0.0600       | 0.0900        | 4.1000      | 0.0806                         | 0.0739 | 0.0203 | 1.1000                | 0.5833                     |
| Part2        | 0               | 0.0001        | 0.1400           | 0.2100           | 0.0700       | 0.0500        | 4.4000      | 0.0427                         | 0.2104 | 0.0282 | 2.6000                | 1.2632                     |
| Part3        | 0               | 0.0001        | 0.1200           | 0.1700           | 0.0700       | 0.0000        | 4.1000      | 0.0040                         | 0.3483 | 0.0364 | 3.2000                | 1.4800                     |
| Part4        | 0               | 0.0001        | 0.0800           | 0.1100           | 0.0500       | 0.0000        | 2.5000      | 0.0026                         | 0.4027 | 0.0317 | 3.2000                | 1.3497                     |
| Part5        | 0               | 0.0003        | 0.0700           | 0.0900           | 0.0400       | 0.0000        | 2.2000      | 0.0015                         | 0.2959 | 0.0250 | 3.3000                | 1.4313                     |
| Part6        | 0               | 0.0000        | 0.0500           | 0.0700           | 0.0300       | 0.0000        | 1.8000      | 0.0020                         | 0.3282 | 0.0201 | 3.5000                | 1.3780                     |

**Table S5.** Correlation coefficient (R) of the KPs derived from the original and the reconstructed spectra/partitions at check point B4. Sample numbers of Part0 to Part6 are 8760, 4304, 8711, 1892, 559, 112, and 15.

| KPs<br>Partn | $H_{m0}$ | $f_p$ | $T_{m01}$ | $T_{m02}$ | $T_e$ | WPD   | WLEN  | $E(f_p)$ | $Q_p$ | FSPR  | $\theta_{0,x}$ | $\theta_{0,y}$ | $\sigma_\theta$ |
|--------------|----------|-------|-----------|-----------|-------|-------|-------|----------|-------|-------|----------------|----------------|-----------------|
| Part0        | 1.000    | 0.976 | 0.989     | 0.965     | 0.999 | 1.000 | 0.952 | 0.999    | 0.962 | 0.966 | 0.999          | 0.999          | 0.992           |
| Part1        | 1.000    | 1.000 | 0.994     | 0.983     | 0.999 | 1.000 | 0.985 | 0.999    | 0.970 | 0.945 | 0.999          | 0.998          | 0.990           |
| Part2        | 1.000    | 1.000 | 0.997     | 0.993     | 0.999 | 1.000 | 0.993 | 0.999    | 0.987 | 0.975 | 0.993          | 0.994          | 0.982           |
| Part3        | 1.000    | 1.000 | 0.999     | 0.998     | 1.000 | 1.000 | 0.999 | 0.999    | 0.978 | 0.966 | 0.987          | 0.990          | 0.899           |
| Part4        | 1.000    | 1.000 | 1.000     | 0.999     | 1.000 | 1.000 | 1.000 | 1.000    | 0.976 | 0.956 | 0.988          | 0.987          | 0.847           |
| Part5        | 1.000    | 1.000 | 0.999     | 0.999     | 0.999 | 1.000 | 0.999 | 1.000    | 0.962 | 0.908 | 0.993          | 0.985          | 0.835           |
| Part6        | 1.000    | 0.998 | 1.000     | 1.000     | 1.000 | 1.000 | 1.000 | 1.000    | 0.975 | 0.942 | 0.995          | 0.996          | 0.989           |

**Table S6.** Mean absolute error (MAE) of the KPs derived from the original and the reconstructed spectra/partitions at check point B4. Sample numbers of Part0 to Part6 are 8760, 4304, 8711, 1892, 559, 112, and 15.

| KPs<br>Partn | $H_{m0}$<br>(m) | $f_p$<br>(Hz) | $T_{m01}$<br>(s) | $T_{m02}$<br>(s) | $T_e$<br>(s) | WPD<br>(kW/m) | WLEN<br>(m) | $E(f_p)$<br>(m <sup>2</sup> s) | $Q_p$  | FSPR   | $\theta_0$<br>(degr.) | $\sigma_\theta$<br>(degr.) |
|--------------|-----------------|---------------|------------------|------------------|--------------|---------------|-------------|--------------------------------|--------|--------|-----------------------|----------------------------|
| Part0        | 0               | 0.0011        | 0.1200           | 0.1900           | 0.0500       | 0.0600        | 3.1000      | 0.0579                         | 0.0471 | 0.0150 | 0.8000                | 0.5712                     |
| Part1        | 0               | 0.0002        | 0.1200           | 0.1900           | 0.0500       | 0.0300        | 3.0000      | 0.0345                         | 0.0721 | 0.0163 | 1.2000                | 0.5469                     |
| Part2        | 0               | 0.0001        | 0.1200           | 0.1800           | 0.0500       | 0.0500        | 3.3000      | 0.0446                         | 0.1514 | 0.0212 | 2.1000                | 0.9332                     |
| Part3        | 0               | 0.0001        | 0.0900           | 0.1200           | 0.0500       | 0.0000        | 2.3000      | 0.0037                         | 0.3943 | 0.0323 | 4.4000                | 1.8894                     |
| Part4        | 0               | 0.0001        | 0.0700           | 0.0900           | 0.0400       | 0.0000        | 1.9000      | 0.0022                         | 0.5371 | 0.0355 | 4.4000                | 1.8198                     |
| Part5        | 0               | 0.0000        | 0.0600           | 0.0800           | 0.0500       | 0.0000        | 1.7000      | 0.0012                         | 0.4753 | 0.0369 | 3.6000                | 1.6452                     |
| Part6        | 0               | 0.0014        | 0.0300           | 0.0400           | 0.0200       | 0.0000        | 0.8000      | 0.0005                         | 0.2139 | 0.0277 | 4.4000                | 1.8823                     |

**Table S7.** Correlation coefficient (R) of the KPs derived from the original and the reconstructed (obtained under different strategies of  $n^{fr}$  and  $n^{tl}$ ) partitions at check point B1. The R values were derived from all the partitions identified, and the values illustrated under the other  $n^{fr}$  and  $n^{tl}$  combinations are relative to those obtained under the setting of  $n^{fr} = 3$  and  $n^{tl} = 6$ .

| KPs<br>$n^{fr} \& n^{tl}$ | $H_{m0}$ | $f_p$   | $T_{m01}$ | $T_{m02}$ | $T_e$  | WPD    | WLEN   | $E(f_p)$ | $Q_p$  | FSPR   |
|---------------------------|----------|---------|-----------|-----------|--------|--------|--------|----------|--------|--------|
| $n^{fr} = 3, n^{tl} = 6$  | 1        | 0.9996  | 0.9970    | 0.9930    | 0.9993 | 0.9999 | 0.9945 | 0.9991   | 0.9883 | 0.9765 |
| $n^{fr} = 4, n^{tl} = 6$  | 0        | -0.0008 | 0.0001    | 0.0000    | 0.0003 | 0.0000 | 0.0001 | 0.0008   | 0.0055 | 0.0123 |

|                          |   |         |         |         |         |         |         |         |         |         |
|--------------------------|---|---------|---------|---------|---------|---------|---------|---------|---------|---------|
| $n^{fr} = 6, n^{tl} = 6$ | 0 | -0.0010 | 0.0001  | 0.0001  | 0.0003  | 0.0000  | 0.0002  | 0.0008  | 0.0072  | 0.0137  |
| $n^{fr} = 3, n^{tl} = 4$ | 0 | -0.0017 | -0.0160 | -0.0280 | -0.0044 | -0.0001 | -0.0239 | -0.0003 | -0.0187 | -0.0179 |
| $n^{fr} = 3, n^{tl} = 3$ | 0 | 0.0004  | -0.0252 | -0.0419 | -0.0080 | -0.0003 | -0.0347 | -0.0020 | -0.0277 | -0.0433 |

**Table S8.** Mean absolute error (MAE) of the KPs derived from the original and the reconstructed (obtained under different strategies of  $n^{fr}$  and  $n^{tl}$ ) partitions at check point B1. The MAE values were derived from all the partitions identified, and the values illustrated under the other  $n^{fr}$  and  $n^{tl}$  combinations are relative to those obtained under the setting of  $n^{fr} = 3$  and  $n^{tl} = 6$ .

| $n^{fr} \& n^{tl}$ \ KPs | $H_{m0}$<br>(m) | $f_p$<br>(Hz) | $T_{m01}$<br>(s) | $T_{m02}$<br>(s) | $T_e$<br>(s) | WPD<br>(kW/m) | WLEN    | $E(f_p)$ | $Q_p$   | FSPR    |
|--------------------------|-----------------|---------------|------------------|------------------|--------------|---------------|---------|----------|---------|---------|
| $n^{fr} = 3, n^{tl} = 6$ | 0               | 0.0001        | 0.1306           | 0.2023           | 0.0577       | 0.0426        | 3.9658  | 0.0420   | 0.2082  | 0.0259  |
| $n^{fr} = 4, n^{tl} = 6$ | 0               | 0.0001        | -0.0037          | -0.0023          | -0.0105      | -0.0073       | -0.0682 | -0.0284  | -0.0487 | -0.0062 |
| $n^{fr} = 6, n^{tl} = 6$ | 0               | 0.0003        | -0.0036          | -0.0038          | -0.0083      | -0.0027       | -0.1443 | -0.0329  | -0.0978 | -0.0087 |
| $n^{fr} = 3, n^{tl} = 4$ | 0               | 0.0004        | 0.2753           | 0.3785           | 0.1351       | 0.1682        | 8.3011  | 0.1006   | 0.2320  | 0.0101  |
| $n^{fr} = 3, n^{tl} = 3$ | 0               | -0.0001       | 0.3854           | 0.5174           | 0.2031       | 0.2438        | 11.3906 | 0.1842   | 0.3499  | 0.0238  |

**Table S9.** Correlation coefficient (R) of the KPs derived from the original and the reconstructed (obtained under different strategies of  $n^{fr}$  and  $n^{tl}$ ) partitions at check point B3. The R values were derived from all the partitions identified, and the values illustrated under the other  $n^{fr}$  and  $n^{tl}$  combinations are relative to those obtained under the setting of  $n^{fr} = 3$  and  $n^{tl} = 6$ .

| $n^{fr} \& n^{tl}$ \ KPs | $H_{m0}$ | $f_p$   | $T_{m01}$ | $T_{m02}$ | $T_e$   | WPD     | WLEN    | $E(f_p)$ | $Q_p$   | FSPR    |
|--------------------------|----------|---------|-----------|-----------|---------|---------|---------|----------|---------|---------|
| $n^{fr} = 3, n^{tl} = 6$ | 1        | 0.9997  | 0.9966    | 0.9927    | 0.9992  | 0.9998  | 0.9943  | 0.9970   | 0.9883  | 0.9714  |
| $n^{fr} = 4, n^{tl} = 6$ | 0        | -0.0012 | 0.0001    | 0.0000    | 0.0003  | 0.0000  | 0.0001  | 0.0026   | 0.0061  | 0.0164  |
| $n^{fr} = 6, n^{tl} = 6$ | 0        | -0.0007 | 0.0001    | 0.0001    | 0.0003  | 0.0000  | 0.0002  | 0.0027   | 0.0076  | 0.0183  |
| $n^{fr} = 3, n^{tl} = 4$ | 0        | -0.0024 | -0.0169   | -0.0262   | -0.0056 | -0.0006 | -0.0194 | -0.0013  | -0.0198 | -0.0162 |
| $n^{fr} = 3, n^{tl} = 3$ | 0        | 0.0003  | -0.0331   | -0.0482   | -0.0130 | -0.0019 | -0.0358 | -0.0138  | -0.0350 | -0.0462 |

**Table S10.** Mean absolute error (MAE) of the KPs derived from the original and the reconstructed (obtained under different strategies of  $n^{fr}$  and  $n^{tl}$ ) partitions at check point B3. The MAE values were derived from all the partitions identified, and the values illustrated under the other  $n^{fr}$  and  $n^{tl}$  combinations are relative to those obtained under the setting of  $n^{fr} = 3$  and  $n^{tl} = 6$ .

| $n^{fr} \& n^{tl}$ \ KPs | $H_{m0}$<br>(m) | $f_p$<br>(Hz) | $T_{m01}$<br>(s) | $T_{m02}$<br>(s) | $T_e$<br>(s) | WPD<br>(kW/m) | WLEN    | $E(f_p)$ | $Q_p$   | FSPR    |
|--------------------------|-----------------|---------------|------------------|------------------|--------------|---------------|---------|----------|---------|---------|
| $n^{fr} = 3, n^{tl} = 6$ | 0               | 0.0001        | 0.1413           | 0.2109           | 0.0657       | 0.0499        | 4.1461  | 0.0470   | 0.1957  | 0.0269  |
| $n^{fr} = 4, n^{tl} = 6$ | 0               | 0.0002        | -0.0057          | -0.0040          | -0.0136      | -0.0100       | -0.1139 | -0.0330  | -0.0439 | -0.0067 |
| $n^{fr} = 6, n^{tl} = 6$ | 0               | 0.0003        | -0.0058          | -0.0058          | -0.0112      | -0.0070       | -0.1939 | -0.0371  | -0.0861 | -0.0087 |
| $n^{fr} = 3, n^{tl} = 4$ | 0               | 0.0005        | 0.2811           | 0.3705           | 0.1482       | 0.1472        | 7.9062  | 0.0858   | 0.2211  | 0.0084  |
| $n^{fr} = 3, n^{tl} = 3$ | 0               | -0.0001       | 0.4341           | 0.5520           | 0.2501       | 0.2864        | 11.7368 | 0.2308   | 0.3676  | 0.0285  |

**Table S11.** Correlation coefficient (R) of the KPs derived from the original and the reconstructed (obtained under different strategies of  $n^{fr}$  and  $n^{tl}$ ) partitions at check point B4. The R values were derived from all the partitions identified, and the values illustrated under the other  $n^{fr}$  and  $n^{tl}$  combinations are relative to those obtained under the setting of  $n^{fr} = 3$  and  $n^{tl} = 6$ .

| $n^{fr} \& n^{tl}$ \ KPs | $H_{m0}$ | $f_p$   | $T_{m01}$ | $T_{m02}$ | $T_e$   | WPD     | WLEN    | $E(f_p)$ | $Q_p$   | FSPR    |
|--------------------------|----------|---------|-----------|-----------|---------|---------|---------|----------|---------|---------|
| $n^{fr} = 3, n^{tl} = 6$ | 1        | 0.9996  | 0.9974    | 0.9941    | 0.9994  | 1.0000  | 0.9951  | 0.9992   | 0.9883  | 0.9788  |
| $n^{fr} = 4, n^{tl} = 6$ | 0        | -0.0006 | 0.0001    | 0.0001    | 0.0002  | 0.0000  | 0.0001  | 0.0007   | 0.0061  | 0.0109  |
| $n^{fr} = 6, n^{tl} = 6$ | 0        | -0.0007 | 0.0001    | 0.0001    | 0.0002  | 0.0000  | 0.0001  | 0.0007   | 0.0074  | 0.0123  |
| $n^{fr} = 3, n^{tl} = 4$ | 0        | -0.0011 | -0.0161   | -0.0288   | -0.0043 | -0.0003 | -0.0260 | -0.0005  | -0.0173 | -0.0168 |
| $n^{fr} = 3, n^{tl} = 3$ | 0        | 0.0004  | -0.0282   | -0.0478   | -0.0087 | -0.0007 | -0.0446 | -0.0035  | -0.0256 | -0.0396 |

**Table S12.** Mean absolute error (MAE) of the KPs derived from the original and the reconstructed (obtained under different strategies of  $n^{fr}$  and  $n^{tl}$ ) partitions at check point B4. The MAE values were derived from all the partitions identified, and the values illustrated under the other  $n^{fr}$  and  $n^{tl}$  combinations are relative to those obtained under the setting of  $n^{fr} = 3$  and  $n^{tl} = 6$ .

| $n^{fr} \& n^{tl}$       | KPs | $H_{m0}$<br>(m) | $f_p$<br>(Hz) | $T_{m01}$<br>(s) | $T_{m02}$<br>(s) | $T_e$<br>(s) | WPD<br>(kW/m) | WLEN    | $E(f_p)$ | $Q_p$   | FSPR    |
|--------------------------|-----|-----------------|---------------|------------------|------------------|--------------|---------------|---------|----------|---------|---------|
| $n^{fr} = 3, n^{tl} = 6$ |     | 0               | 0.0001        | 0.1112           | 0.1730           | 0.0485       | 0.0373        | 3.0269  | 0.0350   | 0.1753  | 0.0218  |
| $n^{fr} = 4, n^{tl} = 6$ |     | 0               | 0.0001        | -0.0023          | -0.0012          | -0.0082      | -0.0068       | -0.0234 | -0.0239  | -0.0463 | -0.0057 |
| $n^{fr} = 6, n^{tl} = 6$ |     | 0               | 0.0002        | -0.0021          | -0.0023          | -0.0068      | -0.0044       | -0.0595 | -0.0279  | -0.0880 | -0.0074 |
| $n^{fr} = 3, n^{tl} = 4$ |     | 0               | 0.0004        | 0.2962           | 0.4080           | 0.1424       | 0.1931        | 7.7349  | 0.1028   | 0.2222  | 0.0088  |
| $n^{fr} = 3, n^{tl} = 3$ |     | 0               | -0.0001       | 0.4241           | 0.5668           | 0.2218       | 0.3072        | 10.8363 | 0.2074   | 0.3509  | 0.0222  |

**Table S13.** Correlation coefficient (R) of the KPs derived from the original and the reconstructed spectra (with the three and six largest partitions) at check point B1. The values of R are expressed as the differences to those obtained from the original spectra and the reconstructed ones using the four largest partitions.

| Part.    | KPs | $H_{m0}$ | $f_p$  | $T_{m01}$ | $T_{m02}$ | $T_e$  | WPD   | WLEN  | $E(f_p)$ | $Q_p$  | FSPR   | $\theta_{0,x}$ | $\theta_{0,y}$ | $\sigma_\theta$ |
|----------|-----|----------|--------|-----------|-----------|--------|-------|-------|----------|--------|--------|----------------|----------------|-----------------|
| Largest3 |     | 0        | -0.003 | -0.001    | -0.001    | -0.001 | 0.000 | 0.000 | 0.000    | -0.004 | -0.006 | 0.000          | -0.001         | -0.004          |
| Largest6 |     | 0        | 0.000  | 0.000     | 0.000     | 0.000  | 0.000 | 0.000 | 0.000    | 0.000  | 0.001  | 0.000          | 0.000          | 0.000           |

**Table S14.** Mean absolute error (MAE) of the KPs derived from the original and the reconstructed spectra (with the three and six largest partitions) at check point B1. The values of MAE are expressed as the differences to those obtained from the original spectra and the reconstructed ones using the four largest partitions.

| Part.    | KPs | $H_{m0}$<br>(m) | $f_p$<br>(Hz) | $T_{m01}$<br>(s) | $T_{m02}$<br>(s) | $T_e$<br>(s) | WPD<br>(kW/m) | WLEN<br>(m) | $E(f_p)$<br>(m <sup>2</sup> s) | $Q_p$ | FSPR  | $\theta_0$<br>(degr.) | $\sigma_\theta$<br>(degr.) |
|----------|-----|-----------------|---------------|------------------|------------------|--------------|---------------|-------------|--------------------------------|-------|-------|-----------------------|----------------------------|
| Largest3 |     | 0               | 0.000         | 0.010            | 0.000            | 0.010        | 0.010         | 0.100       | 0.002                          | 0.003 | 0.001 | 0.100                 | 0.119                      |
| Largest6 |     | 0               | 0.000         | 0.000            | 0.000            | 0.000        | 0.000         | 0.000       | 0.000                          | 0.000 | 0.000 | 0.000                 | -0.009                     |

**Table S15.** Correlation coefficient (R) of the KPs derived from the original and the reconstructed spectra (with the three and six largest partitions) at check point B3. The values of R are expressed as the differences to those obtained from the original spectra and the reconstructed ones using the four largest partitions.

| Part.    | KPs | $H_{m0}$ | $f_p$  | $T_{m01}$ | $T_{m02}$ | $T_e$  | WPD   | WLEN   | $E(f_p)$ | $Q_p$  | FSPR   | $\theta_{0,x}$ | $\theta_{0,y}$ | $\sigma_\theta$ |
|----------|-----|----------|--------|-----------|-----------|--------|-------|--------|----------|--------|--------|----------------|----------------|-----------------|
| Largest3 |     | 0        | -0.003 | -0.001    | -0.001    | -0.001 | 0.000 | -0.001 | 0.000    | -0.004 | -0.005 | 0.000          | -0.001         | -0.005          |
| Largest6 |     | 0        | 0.000  | 0.000     | 0.000     | 0.000  | 0.000 | 0.000  | 0.000    | 0.000  | 0.001  | 0.000          | 0.000          | 0.000           |

**Table S16.** Mean absolute error (MAE) of the KPs derived from the original and the reconstructed spectra (with the three and six largest partitions) at check point B3. The values of MAE are expressed as the differences to those obtained from the original spectra and the reconstructed ones using the four largest partitions.

| Part.    | KPs | $H_{m0}$<br>(m) | $f_p$<br>(Hz) | $T_{m01}$<br>(s) | $T_{m02}$<br>(s) | $T_e$<br>(s) | WPD<br>(kW/m) | WLEN<br>(m) | $E(f_p)$<br>(m <sup>2</sup> s) | $Q_p$ | FSPR  | $\theta_0$<br>(degr.) | $\sigma_\theta$<br>(degr.) |
|----------|-----|-----------------|---------------|------------------|------------------|--------------|---------------|-------------|--------------------------------|-------|-------|-----------------------|----------------------------|
| Largest3 |     | 0               | 0.000         | 0.010            | 0.000            | 0.010        | 0.010         | 0.100       | 0.003                          | 0.003 | 0.001 | 0.100                 | 0.080                      |
| Largest6 |     | 0               | 0.000         | 0.000            | 0.000            | 0.000        | 0.000         | 0.000       | 0.000                          | 0.000 | 0.000 | 0.000                 | -0.004                     |

**Table S17.** Correlation coefficient (R) of the KPs derived from the original and the reconstructed spectra (with the three and six largest partitions) at check point B4. The values of R are expressed as the differences to those obtained from the original spectra and the reconstructed ones using the four largest partitions.

| Part.    | KPs | $H_{m0}$ | $f_p$  | $T_{m01}$ | $T_{m02}$ | $T_e$ | WPD   | WLEN  | $E(f_p)$ | $Q_p$  | FSPR   | $\theta_{0,x}$ | $\theta_{0,y}$ | $\sigma_\theta$ |
|----------|-----|----------|--------|-----------|-----------|-------|-------|-------|----------|--------|--------|----------------|----------------|-----------------|
| Largest3 |     | 0        | -0.005 | 0.000     | 0.000     | 0.000 | 0.000 | 0.000 | 0.000    | -0.001 | -0.003 | 0.000          | 0.000          | -0.002          |
| Largest6 |     | 0        | 0.000  | 0.000     | 0.000     | 0.000 | 0.000 | 0.000 | 0.000    | 0.000  | 0.000  | 0.000          | 0.000          | 0.000           |

**Table S18.** Mean absolute error (MAE) of the KPs derived from the original and the reconstructed spectra (with the three and six largest partitions) at check point B4. The values of MAE are expressed as the differences to those obtained from the original spectra and the reconstructed ones using the four largest partitions.



[illegible]
